# Supplementary material
Source: Springer Nature journal article supplement (https://www.springermedizin.de/resource/supplementary/12974_2010_303_MOESM5_ESM.pdf/9601208)

**A**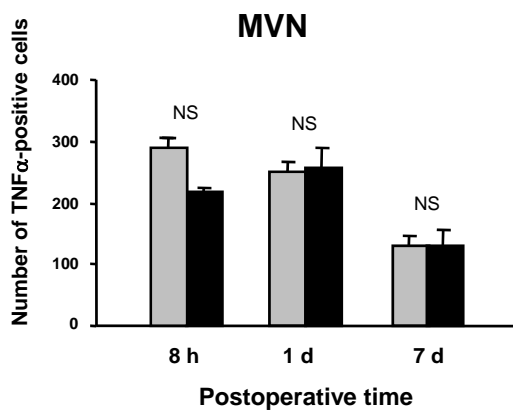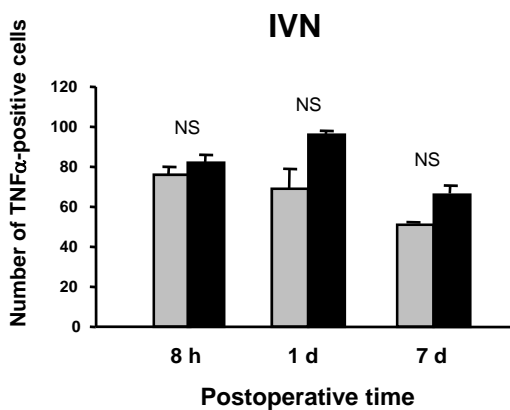**B**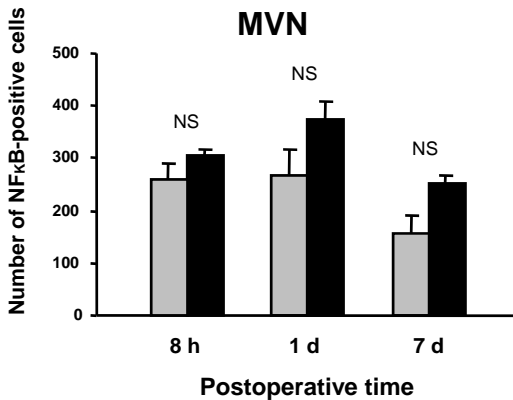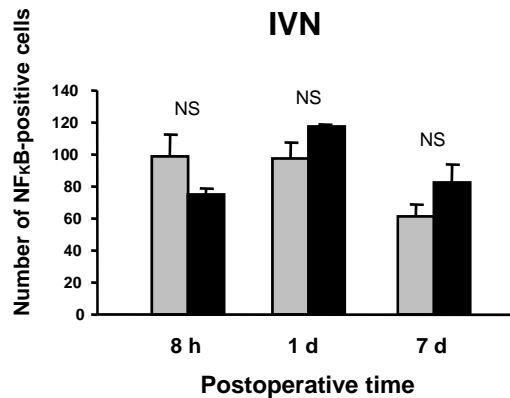**C**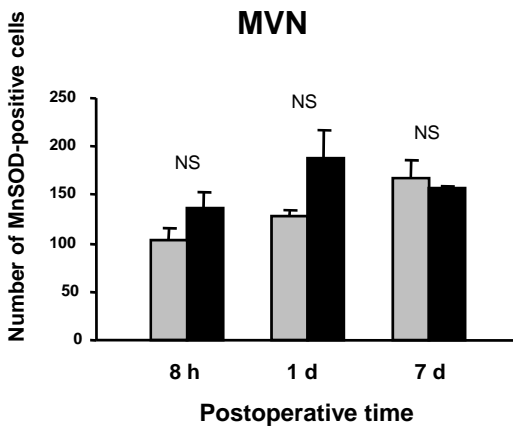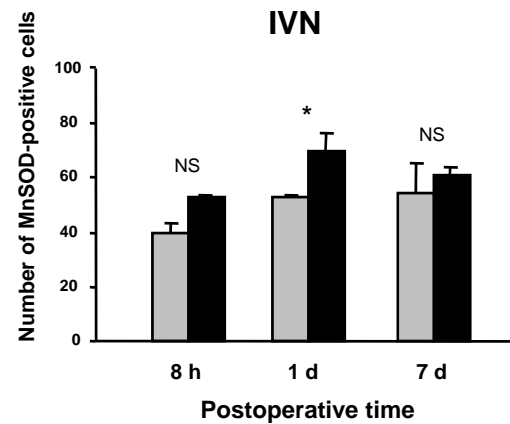

Supplement: MOESM5 [file 9601208]
